# Supplementary material for: Federated Learning of Electronic Health Records to Improve Mortality Prediction in Hospitalized Patients With COVID-19: Machine Learning Approach
Source: PubMed Central journal article supplement (PMC7842859; doi:10.2196/24207), 2021-01-27
Supplement: medinform_v9i1e24207_app2.pdf [file medinform_v9i1e24207_app2.pdf]

Supplementary Table 1: Clinical Characteristics of Hospitalized COVID Patients at Baseline.

|                                                        | Mount Sinai Brooklyn (MSB) | Mount Sinai Hospital (MSH) | Mount Sinai Morningside (MSM) | Mount Sinai Queens (MSQ) | Mount Sinai West (MSW) | P-Value | % Missing |
|--------------------------------------------------------|----------------------------|----------------------------|-------------------------------|--------------------------|------------------------|---------|-----------|
| (N)                                                    | 611                        | 1644                       | 749                           | 540                      | 485                    |         |           |
| <b>Vital Signs at Hospital Admission, median (IQR)</b> |                            |                            |                               |                          |                        |         |           |
| Heart Rate, bpm                                        | 87.0 [76.0,99.0]           | 87.0 [76.0,97.0]           | 87.0 [76.0,98.0]              | 87.0 [76.0,99.0]         | 82.0 [73.0,95.0]       | 0.002   | 0.02%     |
| Pulse Oximetry, %                                      | 97.0 [95.0,98.0]           | 96.0 [94.0,98.0]           | 96.0 [94.0,98.0]              | 96.0 [94.0,97.8]         | 96.0 [95.0,98.0]       | <0.001  | 0.32%     |
| Respiration Rate, breaths/minute                       | 18.0 [18.0,20.0]           | 20.0 [18.0,21.0]           | 19.0 [18.0,21.0]              | 18.0 [18.0,20.0]         | 18.0 [17.0,20.0]       | <0.001  | 0.02%     |
| Temperature, F                                         | 97.8 [97.1,98.6]           | 98.6 [98.0,99.8]           | 98.7 [97.9,99.7]              | 98.6 [98.0,99.3]         | 98.5 [97.8,99.2]       | <0.001  | 0.02%     |
| Systolic Blood Pressure, mm Hg                         | 70.0 [62.0,80.0]           | 69.0 [61.0,78.0]           | 73.0 [66.0,82.0]              | 70.0 [63.0,79.0]         | 73.0 [64.0,81.0]       | <0.001  | 0.05%     |
| Diastolic Blood Pressure, mmHg                         | 128.0 [114.0,141.0]        | 125.0 [112.0,140.0]        | 124.0 [111.0,140.0]           | 126.0 [109.0,140.0]      | 123.0 [110.0,136.0]    | 0.011   | 0.05%     |
| <b>Admission Laboratory Parameters, median (IQR)</b>   |                            |                            |                               |                          |                        |         |           |
| <b>Metabolic Markers</b>                               |                            |                            |                               |                          |                        |         |           |
| Anion Gap, mEq/L                                       | 12.5 [10.0,15.0]           | 11.5 [9.8,13.5]            | 12.0 [10.0,14.0]              | 12.1 [10.3,14.7]         | 12.0 [11.0,14.0]       | <0.001  | 2.04%     |
| Bicarbonate, mEq/L                                     | 23.0 [21.0,26.0]           | 24.4 [21.9,27.0]           | 23.0 [20.0,25.0]              | 22.9 [19.9,25.3]         | 22.0 [19.0,23.8]       | <0.001  | 2.01%     |
| Blood Urea Nitrogen, mg/dL                             | 23.0 [13.0,48.0]           | 18.0 [11.0,34.0]           | 19.0 [13.0,36.0]              | 21.0 [14.0,44.8]         | 18.0 [11.0,28.0]       | <0.001  | 2.95%     |
| Calcium, mEq/L                                         | 7.9 [7.5,8.3]              | 8.4 [8.0,8.7]              | 8.1 [7.8,8.5]                 | 8.1 [7.7,8.5]            | 8.3 [8.0,8.7]          | <0.001  | 2.33%     |
| Chloride, mEq/L                                        | 104.0 [101.0,108.0]        | 103.0 [100.0,106.0]        | 104.0 [101.0,108.0]           | 104.0 [101.0,109.0]      | 103.0 [100.0,107.0]    | <0.001  | 2.23%     |
| Creatinine, mg/dL                                      | 1.2 [0.8,2.1]              | 0.9 [0.7,1.5]              | 1.0 [0.8,1.7]                 | 1.0 [0.8,1.7]            | 0.9 [0.7,1.2]          | <0.001  | 2.06%     |
| Glomerular Filtration Rate, mL/min                     | 52.0 [29.0,74.2]           | 43.3 [21.8,54.6]           | 62.0 [34.2,91.0]              | 39.7 [17.5,53.8]         | 78.0 [53.0,106.0]      | <0.001  | 27.55%    |
| Glucose, mg/dL                                         | 117.0 [95.0,171.0]         | 112.0 [95.0,152.0]         | 111.5 [93.0,160.0]            | 122.0 [99.0,175.5]       | 104.0 [89.8,140.2]     | <0.001  | 2.04%     |
| Potassium, mEq/L                                       | 4.2 [3.8,4.7]              | 4.0 [3.6,4.5]              | 4.3 [3.9,4.7]                 | 4.3 [3.9,4.7]            | 4.3 [4.0,4.7]          | <0.001  | 2.18%     |
| Sodium, mEq/L                                          | 140.0 [137.0,143.0]        | 138.0 [135.0,141.0]        | 139.0 [136.0,142.0]           | 140.0 [136.0,143.0]      | 137.0 [135.0,140.0]    | <0.001  | 2.06%     |
| <b>Liver Function</b>                                  |                            |                            |                               |                          |                        |         |           |
| Albumin, g/dL                                          | 3.3 [2.9,3.5]              | 2.9 [2.5,3.2]              | 2.8 [2.4,3.1]                 | 2.7 [2.4,3.0]            | 2.9 [2.6,3.2]          | <0.001  | 6.83%     |
| Alkaline Phosphatase, units/L                          | 68.0 [54.0,91.0]           | 79.0 [61.0,106.0]          | 74.0 [58.0,95.0]              | 82.0 [62.0,110.0]        | 77.0 [60.2,104.0]      | <0.001  | 6.95%     |
| Alanine Aminotransferase, units/L                      | 27.0 [17.0,49.0]           | 30.0 [18.0,53.0]           | 30.0 [18.0,53.0]              | 35.0 [22.0,61.2]         | 29.0 [19.0,52.0]       | <0.001  | 6.97%     |
| Aspartate Aminotransferase, units/L                    | 42.0 [27.0,70.2]           | 41.0 [28.0,65.0]           | 44.0 [30.0,72.0]              | 48.0 [30.0,78.2]         | 43.0 [28.0,71.0]       | <0.001  | 7.17%     |
| Total Bilirubin, mg/dL                                 | 0.6 [0.4,0.8]              | 0.6 [0.4,0.8]              | 0.6 [0.4,0.8]                 | 0.6 [0.4,0.8]            | 0.5 [0.4,0.7]          | <0.001  | 8.54%     |
| Total Protein, g/dL                                    | 6.5 [6.0,7.0]              | 6.4 [6.0,6.9]              | 6.5 [6.1,6.9]                 | 6.4 [5.9,6.8]            | 6.5 [6.0,7.0]          | 0.008   | 6.75%     |
| <b>Inflammatory Markers</b>                            |                            |                            |                               |                          |                        |         |           |
| C Reactive Protein, mg/L                               | 147.5 [74.4,243.3]         | 112.7 [54.0,195.2]         | 138.4 [75.3,218.8]            | 128.8 [61.1,213.3]       | 105.1 [46.9,194.9]     | <0.001  | 21.32%    |
| <b>Hematological Markers</b>                           |                            |                            |                               |                          |                        |         |           |
| Hematocrit, %                                          | 38.1 [33.5,42.3]           | 37.7 [32.8,42.0]           | 39.8 [35.1,43.2]              | 37.9 [33.5,42.1]         | 39.0 [34.6,42.9]       | <0.001  | 2.26%     |
| Hemoglobin, mEq/L                                      | 12.3 [10.7,13.6]           | 12.2 [10.5,13.5]           | 12.8 [11.1,13.8]              | 12.7 [11.2,14.1]         | 12.7 [11.2,13.8]       | <0.001  | 2.46%     |
| Lymphocyte Count                                       | 1.1 [0.7,1.5]              | 0.9 [0.6,1.3]              | 1.1 [0.8,1.4]                 | 0.9 [0.6,1.3]            | 1.1 [0.8,1.5]          | <0.001  | 8.79%     |
| Lymphocyte Percentage, %                               | 14.6 [8.4,22.6]            | 12.9 [7.2,20.4]            | 13.7 [8.6,21.0]               | 11.1 [7.0,17.5]          | 13.9 [8.9,20.4]        | <0.001  | 6.25%     |
| Mean Corpuscular Hemoglobin Concentration, g/dL        | 29.3 [27.3,30.8]           | 29.4 [27.9,30.7]           | 30.0 [28.1,31.2]              | 30.7 [29.3,32.0]         | 29.9 [28.4,31.2]       | <0.001  | 2.48%     |
| Mean Corpuscular Volume, fL                            | 91.1 [86.6,95.2]           | 89.1 [85.4,92.5]           | 92.9 [88.6,96.9]              | 92.0 [88.3,95.8]         | 91.6 [87.5,94.6]       | <0.001  | 2.90%     |
| Monocyte Count                                         | 0.5 [0.3,0.7]              | 0.5 [0.3,0.7]              | 0.5 [0.3,0.7]                 | 0.5 [0.3,0.7]            | 0.5 [0.3,0.8]          | <0.001  | 8.71%     |
| Monocyte Percentage, %                                 | 6.4 [4.4,9.2]              | 6.4 [4.0,9.4]              | 6.3 [4.1,9.0]                 | 6.0 [3.8,8.8]            | 6.6 [4.4,9.2]          | 0.133   | 6.21%     |
| Mean Platelet Volume, fL                               | 8.5 [7.7,9.4]              | 8.6 [7.9,9.5]              | 8.6 [7.8,9.5]                 | 8.4 [7.6,9.4]            | 8.4 [7.7,9.3]          | 0.001   | 2.98%     |
| Neutrophil Count                                       | 5.5 [3.6,8.8]              | 5.3 [3.5,8.5]              | 6.0 [4.1,9.5]                 | 6.5 [4.3,9.8]            | 6.3 [3.9,9.8]          | <0.001  | 6.23%     |
| Neutrophil Percentage, %                               | 77.4 [67.3,84.6]           | 78.2 [68.0,86.0]           | 78.3 [69.0,85.5]              | 79.4 [69.7,86.0]         | 77.7 [67.7,84.5]       | 0.11    | 6.48%     |
| Platelet Count                                         | 207.0 [153.0,270.0]        | 221.0 [166.5,295.0]        | 200.0 [151.0,274.0]           | 228.5 [163.2,310.0]      | 210.0 [159.0,275.0]    | <0.001  | 2.61%     |
| RBC Count                                              | 4.2 [3.6,4.8]              | 4.2 [3.6,4.6]              | 4.3 [3.8,4.7]                 | 4.2 [3.6,4.6]            | 4.3 [3.8,4.7]          | <0.001  | 2.61%     |
| Red Blood Cell Distribution Width, %                   | 13.3 [12.6,14.4]           | 14.5 [13.7,16.0]           | 12.8 [12.2,14.0]              | 12.8 [12.1,14.1]         | 12.7 [12.0,13.8]       | <0.001  | 3.45%     |
| White Blood Cell Count, 10 <sup>3</sup> /L             | 7.4 [5.3,10.5]             | 7.0 [5.0,10.2]             | 7.7 [5.6,10.9]                | 8.0 [5.8,11.2]           | 8.0 [5.8,11.3]         | <0.001  | 2.51%     |
| Mortality within 7 days, n (%)                         | 148 (24.2)                 | 118 (7.2)                  | 93 (12.4)                     | 124 (23.0)               | 27 (5.6)               | <0.001  | 0.00%     |
