# Supplementary material for: Federated Learning of Electronic Health Records to Improve Mortality Prediction in Hospitalized Patients With COVID-19: Machine Learning Approach
Source: PubMed Central journal article supplement (PMC7842859; doi:10.2196/24207), 2021-01-27
Supplement: medinform_v9i1e24207_app3.pdf [file medinform_v9i1e24207_app3.pdf]

Supplementary Table 2: Effects of Class Balancing Techniques on MLP Local AUC-ROC and AUPRC.

|                               | Area under the receiver operating-characteristic (AUC-ROC) |            |                                  |                            |                   | % Mortality |
|-------------------------------|------------------------------------------------------------|------------|----------------------------------|----------------------------|-------------------|-------------|
|                               | Patients                                                   | Unbalanced | Static Class Weights (0.05,0.95) | Proportional Class Weights | 1:1 Undersampling |             |
| Mount Sinai Brooklyn (MSB)    | 611                                                        | 0.840      | 0.852                            | 0.852                      | 0.792             | 17.45%      |
| Mount Sinai Hospital (MSH)    | 1644                                                       | 0.818      | 0.808                            | 0.808                      | 0.768             | 4.67%       |
| Mount Sinai Morningside (MSM) | 749                                                        | 0.793      | 0.811                            | 0.810                      | 0.820             | 9.98%       |
| Mount Sinai Queens (MSQ)      | 540                                                        | 0.776      | 0.795                            | 0.783                      | 0.789             | 13.68%      |
| Mount Sinai West (MSW)        | 485                                                        | 0.806      | 0.885                            | 0.892                      | 0.810             | 5.71%       |
|                               | Area under the precision-recall Curve (AUPRC)              |            |                                  |                            |                   |             |
|                               | Patients                                                   | Unbalanced | Static Class Weights (0.05,0.95) | Proportional Class Weights | 1:1 Undersampling | % Mortality |
| Mount Sinai Brooklyn (MSB)    | 611                                                        | 0.647      | 0.684                            | 0.666                      | 0.585             | 17.45%      |
| Mount Sinai Hospital (MSH)    | 1644                                                       | 0.211      | 0.196                            | 0.197                      | 0.157             | 4.67%       |
| Mount Sinai Morningside (MSM) | 749                                                        | 0.387      | 0.430                            | 0.421                      | 0.444             | 9.98%       |
| Mount Sinai Queens (MSQ)      | 540                                                        | 0.558      | 0.584                            | 0.562                      | 0.555             | 13.68%      |
| Mount Sinai West (MSW)        | 485                                                        | 0.110      | 0.163                            | 0.174                      | 0.079             | 5.71%       |
