# Supplementary material for: Federated Learning of Electronic Health Records to Improve Mortality Prediction in Hospitalized Patients With COVID-19: Machine Learning Approach
Source: PubMed Central journal article supplement (PMC7842859; doi:10.2196/24207), 2021-01-27
Supplement: medinform_v9i1e24207_app6.pdf [file medinform_v9i1e24207_app6.pdf]

Supplementary Table 5: Model Performance Metrics by Site.

|       |                      | Mount Sinai Brooklyn (MSB)    |                       |                       |                       |                       |                       |
|-------|----------------------|-------------------------------|-----------------------|-----------------------|-----------------------|-----------------------|-----------------------|
|       |                      | AUROC                         | AUPRC                 | ACC                   | SENS                  | SPEC                  | F1S                   |
| LASSO | Local                | 0.791 (0.788 - 0.795)         | 0.583 (0.577 - 0.589) | 0.749 (0.744 - 0.755) | 0.736 (0.732 - 0.741) | 0.702 (0.699 - 0.706) | 0.584 (0.580 - 0.588) |
|       | Pooled               | 0.816 (0.814 - 0.819)         | 0.580 (0.575 - 0.586) | 0.723 (0.719 - 0.728) | 0.784 (0.780 - 0.788) | 0.701 (0.697 - 0.705) | 0.605 (0.602 - 0.608) |
|       | Federated            | 0.793 (0.790 - 0.796)         | 0.541 (0.536 - 0.546) | 0.710 (0.706 - 0.714) | 0.755 (0.750 - 0.760) | 0.680 (0.676 - 0.684) | 0.593 (0.590 - 0.596) |
| MLP   | Local                | 0.822 (0.820 - 0.825)         | 0.602 (0.596 - 0.607) | 0.746 (0.742 - 0.750) | 0.804 (0.799 - 0.809) | 0.693 (0.690 - 0.696) | 0.617 (0.614 - 0.620) |
|       | Pooled               | 0.823 (0.820 - 0.826)         | 0.592 (0.587 - 0.597) | 0.754 (0.750 - 0.758) | 0.819 (0.814 - 0.823) | 0.684 (0.680 - 0.687) | 0.619 (0.616 - 0.623) |
|       | Federated No Noise   | 0.829 (0.826 - 0.832)         | 0.614 (0.609 - 0.619) | 0.762 (0.757 - 0.766) | 0.798 (0.793 - 0.802) | 0.699 (0.696 - 0.702) | 0.629 (0.625 - 0.632) |
|       | Federated With Noise | 0.815 (0.812 - 0.818)         | 0.593 (0.587 - 0.598) | 0.749 (0.745 - 0.753) | 0.769 (0.764 - 0.773) | 0.691 (0.688 - 0.695) | 0.611 (0.608 - 0.615) |
|       |                      | Mount Sinai Hospital (MSH)    |                       |                       |                       |                       |                       |
|       |                      | AUROC                         | AUPRC                 | ACC                   | SENS                  | SPEC                  | F1S                   |
| LASSO | Local                | 0.693 (0.689 - 0.696)         | 0.173 (0.170 - 0.176) | 0.718 (0.708 - 0.728) | 0.609 (0.601 - 0.616) | 0.665 (0.660 - 0.670) | 0.250 (0.246 - 0.254) |
|       | Pooled               | 0.791 (0.788 - 0.794)         | 0.245 (0.240 - 0.249) | 0.708 (0.702 - 0.713) | 0.753 (0.748 - 0.757) | 0.683 (0.680 - 0.686) | 0.285 (0.282 - 0.288) |
|       | Federated            | 0.772 (0.769 - 0.774)         | 0.212 (0.208 - 0.216) | 0.679 (0.672 - 0.685) | 0.740 (0.734 - 0.745) | 0.659 (0.656 - 0.663) | 0.266 (0.263 - 0.269) |
| MLP   | Local                | 0.750 (0.747 - 0.754)         | 0.215 (0.211 - 0.219) | 0.739 (0.731 - 0.747) | 0.649 (0.641 - 0.657) | 0.694 (0.690 - 0.698) | 0.288 (0.283 - 0.292) |
|       | Pooled               | 0.792 (0.789 - 0.795)         | 0.251 (0.247 - 0.256) | 0.738 (0.731 - 0.745) | 0.740 (0.733 - 0.746) | 0.683 (0.680 - 0.686) | 0.302 (0.298 - 0.307) |
|       | Federated No Noise   | 0.786 (0.782 - 0.789)         | 0.256 (0.251 - 0.261) | 0.773 (0.767 - 0.779) | 0.676 (0.668 - 0.685) | 0.713 (0.710 - 0.716) | 0.327 (0.322 - 0.332) |
|       | Federated With Noise | 0.777 (0.773 - 0.780)         | 0.245 (0.240 - 0.250) | 0.765 (0.759 - 0.771) | 0.665 (0.657 - 0.673) | 0.707 (0.704 - 0.710) | 0.317 (0.312 - 0.321) |
|       |                      | Mount Sinai Morningside (MSM) |                       |                       |                       |                       |                       |
|       |                      | AUROC                         | AUPRC                 | ACC                   | SENS                  | SPEC                  | F1S                   |
| LASSO | Local                | 0.660 (0.656 - 0.664)         | 0.214 (0.210 - 0.218) | 0.585 (0.574 - 0.595) | 0.644 (0.632 - 0.655) | 0.576 (0.567 - 0.585) | 0.316 (0.313 - 0.320) |
|       | Pooled               | 0.789 (0.785 - 0.792)         | 0.331 (0.326 - 0.337) | 0.721 (0.714 - 0.728) | 0.744 (0.736 - 0.752) | 0.672 (0.668 - 0.676) | 0.421 (0.416 - 0.426) |
|       | Federated            | 0.767 (0.764 - 0.771)         | 0.321 (0.315 - 0.326) | 0.710 (0.703 - 0.717) | 0.715 (0.707 - 0.723) | 0.665 (0.661 - 0.670) | 0.402 (0.397 - 0.406) |
| MLP   | Local                | 0.747 (0.743 - 0.751)         | 0.333 (0.327 - 0.339) | 0.732 (0.726 - 0.739) | 0.657 (0.648 - 0.666) | 0.686 (0.682 - 0.690) | 0.407 (0.403 - 0.411) |
|       | Pooled               | 0.751 (0.747 - 0.755)         | 0.314 (0.308 - 0.319) | 0.704 (0.696 - 0.711) | 0.703 (0.695 - 0.711) | 0.651 (0.647 - 0.655) | 0.395 (0.391 - 0.400) |
|       | Federated No Noise   | 0.791 (0.788 - 0.795)         | 0.364 (0.358 - 0.370) | 0.751 (0.745 - 0.758) | 0.728 (0.719 - 0.737) | 0.680 (0.677 - 0.684) | 0.445 (0.440 - 0.450) |
|       | Federated With Noise | 0.782 (0.778 - 0.786)         | 0.360 (0.353 - 0.366) | 0.738 (0.731 - 0.745) | 0.705 (0.696 - 0.713) | 0.681 (0.677 - 0.685) | 0.431 (0.426 - 0.436) |
|       |                      | Mount Sinai Queens (MSQ)      |                       |                       |                       |                       |                       |
|       |                      | AUROC                         | AUPRC                 | ACC                   | SENS                  | SPEC                  | F1S                   |
| LASSO | Local                | 0.706 (0.702 - 0.710)         | 0.415 (0.410 - 0.421) | 0.644 (0.638 - 0.651) | 0.686 (0.680 - 0.693) | 0.612 (0.606 - 0.618) | 0.494 (0.491 - 0.497) |
|       | Pooled               | 0.734 (0.730 - 0.737)         | 0.454 (0.449 - 0.460) | 0.688 (0.683 - 0.693) | 0.699 (0.694 - 0.705) | 0.640 (0.635 - 0.645) | 0.523 (0.519 - 0.526) |
|       | Federated            | 0.694 (0.690 - 0.698)         | 0.407 (0.401 - 0.412) | 0.678 (0.672 - 0.684) | 0.645 (0.638 - 0.652) | 0.632 (0.626 - 0.638) | 0.489 (0.486 - 0.493) |
| MLP   | Local                | 0.791 (0.788 - 0.795)         | 0.524 (0.518 - 0.530) | 0.728 (0.723 - 0.733) | 0.779 (0.774 - 0.784) | 0.662 (0.658 - 0.665) | 0.570 (0.565 - 0.575) |
|       | Pooled               | 0.783 (0.779 - 0.786)         | 0.499 (0.493 - 0.504) | 0.714 (0.708 - 0.720) | 0.786 (0.781 - 0.790) | 0.645 (0.641 - 0.649) | 0.561 (0.557 - 0.565) |
|       | Federated No Noise   | 0.809 (0.806 - 0.812)         | 0.555 (0.549 - 0.561) | 0.740 (0.735 - 0.746) | 0.788 (0.784 - 0.793) | 0.679 (0.676 - 0.683) | 0.585 (0.581 - 0.589) |
|       | Federated With Noise | 0.799 (0.796 - 0.802)         | 0.541 (0.535 - 0.547) | 0.739 (0.733 - 0.744) | 0.763 (0.758 - 0.768) | 0.674 (0.670 - 0.677) | 0.581 (0.576 - 0.585) |
|       |                      | Mount Sinai West (MSW)        |                       |                       |                       |                       |                       |
|       |                      | AUROC                         | AUPRC                 | ACC                   | SENS                  | SPEC                  | F1S                   |
| LASSO | Local                | 0.482 (0.473 - 0.491)         | 0.059 (0.057 - 0.061) | 0.583 (0.563 - 0.603) | 0.757 (0.735 - 0.779) | 0.313 (0.284 - 0.342) | 0.138 (0.135 - 0.142) |
|       | Pooled               | 0.829 (0.824 - 0.834)         | 0.258 (0.248 - 0.267) | 0.754 (0.744 - 0.764) | 0.805 (0.799 - 0.812) | 0.709 (0.703 - 0.715) | 0.304 (0.296 - 0.312) |
|       | Federated            | 0.801 (0.796 - 0.807)         | 0.252 (0.243 - 0.262) | 0.749 (0.736 - 0.762) | 0.761 (0.753 - 0.769) | 0.700 (0.694 - 0.707) | 0.300 (0.291 - 0.309) |
| MLP   | Local                | 0.719 (0.711 - 0.727)         | 0.173 (0.166 - 0.181) | 0.722 (0.709 - 0.734) | 0.613 (0.597 - 0.630) | 0.679 (0.669 - 0.689) | 0.254 (0.246 - 0.261) |
|       | Pooled               | 0.842 (0.837 - 0.847)         | 0.263 (0.253 - 0.273) | 0.744 (0.735 - 0.753) | 0.842 (0.833 - 0.851) | 0.699 (0.693 - 0.705) | 0.303 (0.296 - 0.311) |
|       | Federated No Noise   | 0.836 (0.830 - 0.841)         | 0.276 (0.266 - 0.287) | 0.780 (0.772 - 0.789) | 0.805 (0.793 - 0.816) | 0.702 (0.696 - 0.707) | 0.328 (0.319 - 0.336) |
|       | Federated With Noise | 0.831 (0.825 - 0.837)         | 0.272 (0.262 - 0.282) | 0.773 (0.764 - 0.782) | 0.794 (0.783 - 0.805) | 0.697 (0.691 - 0.702) | 0.321 (0.312 - 0.329) |
